# Supplementary material for: Adapted Murine Sepsis Score: Improving the Research in Experimental Sepsis Mouse Model
Source: Hindawi journal article supplement (doi:10.1155/2022/5700853), 2022-01-01

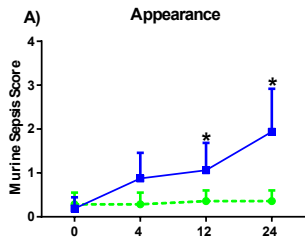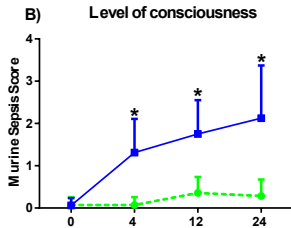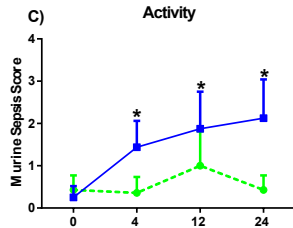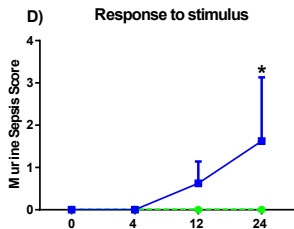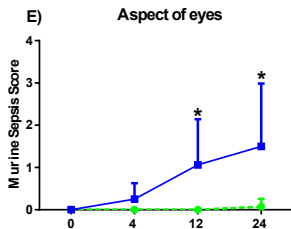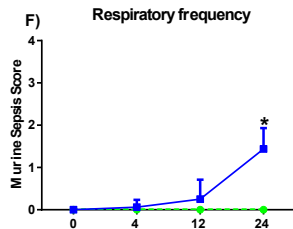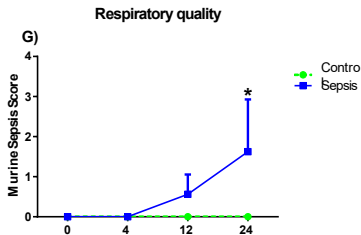

Supplement: f2 [file 5700853.f2.pdf]
